# Supplementary material
Source: MDPI journal article supplement (https://www.mdpi.com/2297-8739/10/3/167)
Supplement: s1 [file s1]

### **Supporting Information, Tables**

**Table S1:** Current UPLC-MS/MS method parameter details

| Method Parameters                          | Experimental Conditions                     |
|--------------------------------------------|---------------------------------------------|
| Column                                     | Waters BEH C18 (100 mm×2.1 mm, 1.7 $\mu$ m) |
| Mobile Phase (v/v)                         | ACN: 0.002 M ammonium acetate (50:50)       |
| Flow rate (mL.min <sup>-1</sup> )          | 0.5                                         |
| Injection Volume ( $\mu$ L)                | 5.0                                         |
| Column backpressure (psi)                  | 7325                                        |
| Column temperature (°C)                    | 30                                          |
| Capillary voltage (kV)                     | 4.0                                         |
| RF (V)                                     | 2.5                                         |
| Extractor (V)                              | 3.0                                         |
| Source Temperature (°C)                    | 145                                         |
| Desolvation temperature (°C)               | 450                                         |
| Cone gas flow (L.Hr <sup>-1</sup> )        | 50                                          |
| Desolvation gas flow (L.Hr <sup>-1</sup> ) | 900                                         |
| LM1 resolution                             | 13                                          |
| HM1 resolution                             | 14                                          |
| LM2 resolution                             | 13                                          |
| HM2 resolution                             | 14                                          |

**Table S2.** Details of MS/MS parameters for studied analytes

| <b>Sl. No.</b> | <b>Compounds</b> | <b>MRM Transition<br/>(<i>m/z</i>)</b> | <b>Mode of Ionization</b> | <b>Dwell time<br/>(min)</b> | <b>Cone Voltage<br/>(V)</b> | <b>Collision Energy(V)</b> |
|----------------|------------------|----------------------------------------|---------------------------|-----------------------------|-----------------------------|----------------------------|
| 1              | NER              | 557.09; 512.02; 111.92                 | ES+                       | 0.05                        | 50.0                        | 26.0                       |
| 2              | NRN              | 273.11;152.954;146.97                  | ES+                       | 0.05                        | 45.0                        | 26.0                       |
| 3              | IMB (I.S.)       | 494.52; 394.14; 217.10                 | ES+                       | 0.05                        | 35.0                        | 18.0                       |

**Table S3.** Data showing extraction recovery and matrix effect

| Compound | Nominal<br>Concentration<br>(ng.mL <sup>-1</sup> ) | Extraction Recovery,<br>(n=6) |        | Matrix effect, (n=6) |        |                    |
|----------|----------------------------------------------------|-------------------------------|--------|----------------------|--------|--------------------|
|          |                                                    | Mean, %                       | RSD, % | Mean, %              | RSD, % | % Matrix<br>effect |
| NER      | 100(LQC)                                           | 85.81                         | 1.16   | 85.86                | 0.66   | 14.13              |
|          | 500(MQC)                                           | 86.45                         | 1.69   | 89.95                | 3.18   | 10.12              |
|          | 1000(HQC)                                          | 88.21                         | 1.17   | 88.60                | 3.24   | 11.46              |
| NRN      | 100(LQC)                                           | 87.09                         | 1.59   | 86.92                | 0.18   | 13.07              |
|          | 500(MQC)                                           | 85.32                         | 1.43   | 90.29                | 4.05   | 9.61               |
|          | 1000(HQC)                                          | 89.44                         | 0.73   | 88.96                | 1.21   | 11.03              |
| IS       | 10                                                 | 86.91                         | 1.88   | 86.86                | 3.03   | 13.16              |

## Supporting Information, Figures

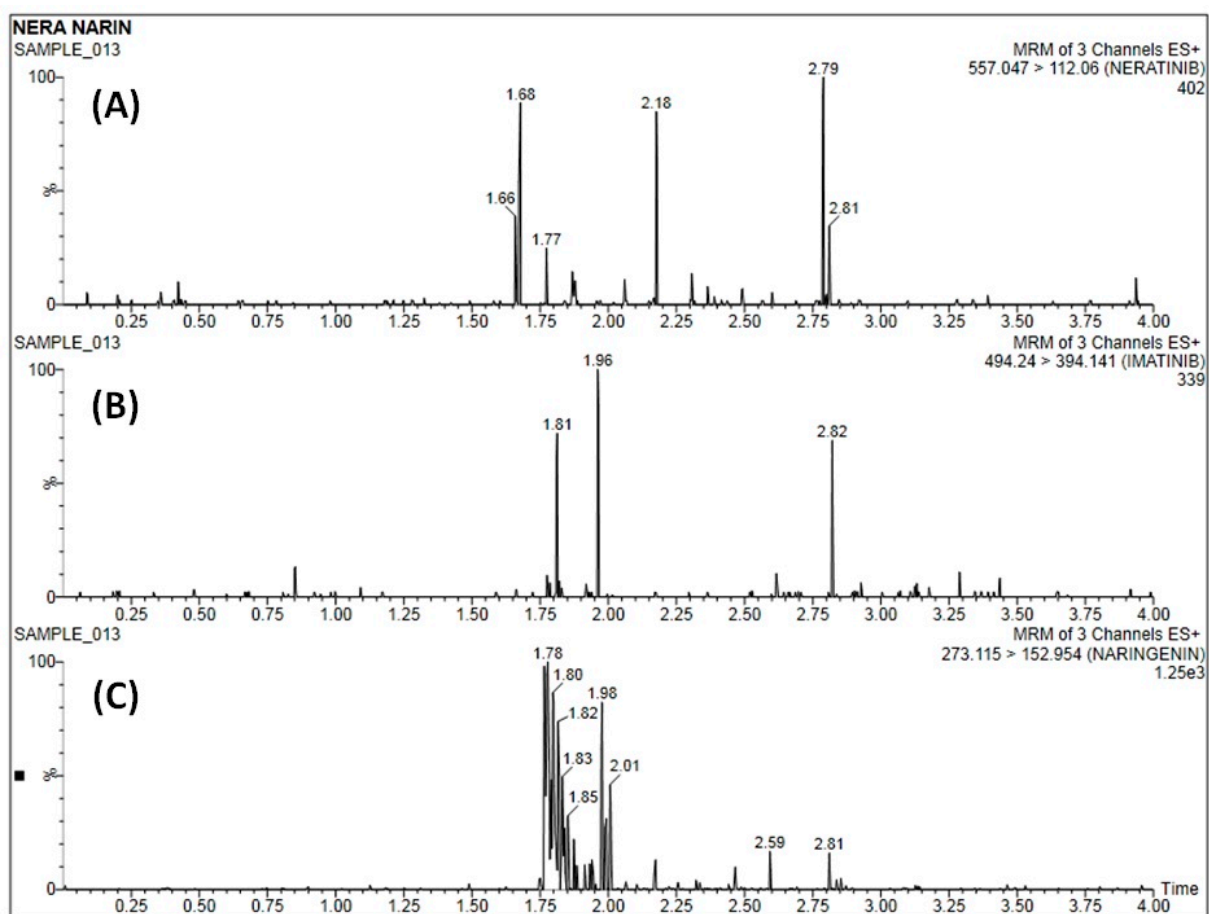

**Figure. S1.** Representative MRM chromatograms of blank plasma samples of (A) NER, (B) I.S. and (C) NRN at 80 ng.mL<sup>-1</sup> concentration

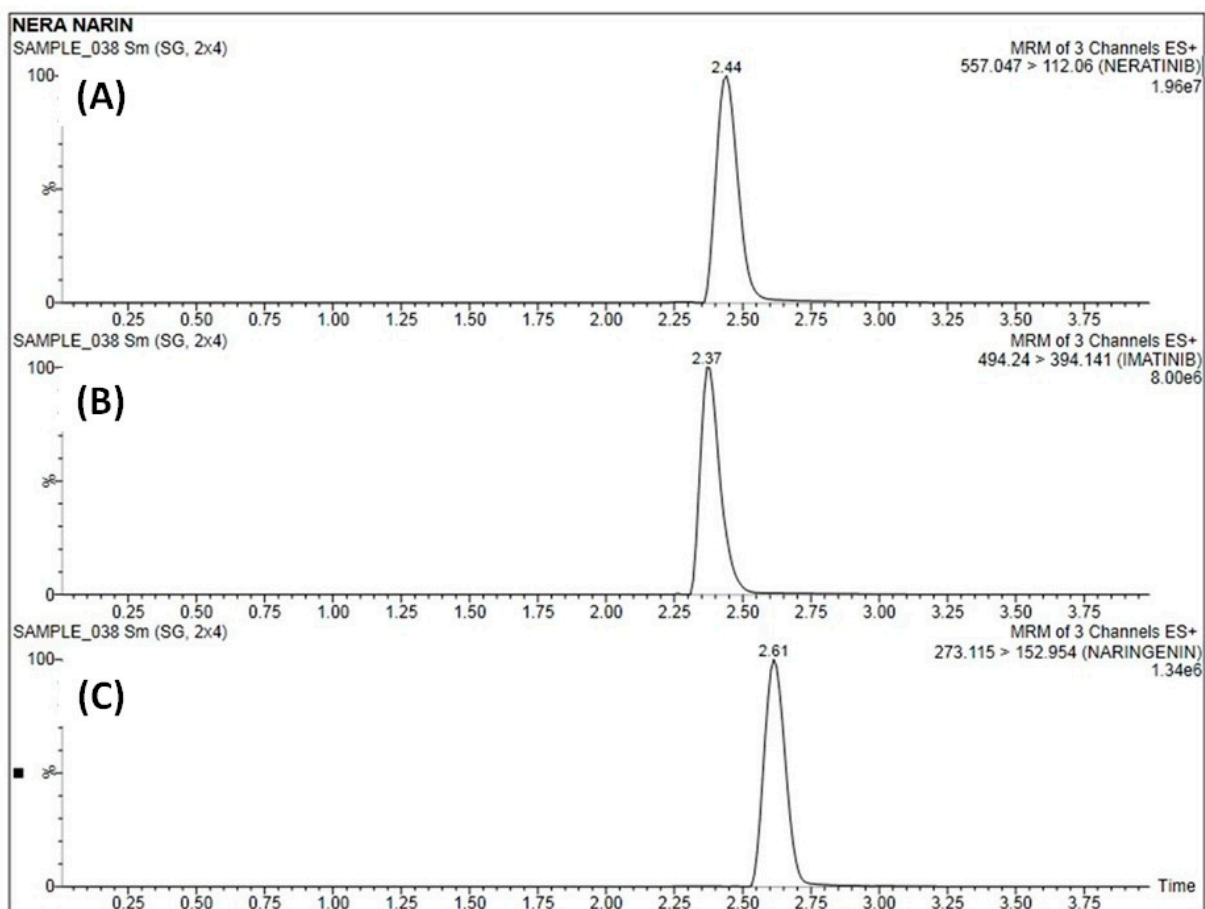

**Figure S2.** Representative MRM chromatograms of plasma samples spiked with (A) NER, (B) IS, and (C) NRN at 80 ng.mL<sup>-1</sup> concentration
